# Supplementary material for: Prominent dielectric transitions in layered organic–inorganic hybrids: (isoamyl-ammonium)2CdX4 (X = Cl and Br)
Source: Royal Society of Chemistry journal article supplement (doi:10.1039/c7qi00270j), 2017-01-01
Supplement: c7qi00270j1.pdf [file c7qi00270j1.pdf]

## Supporting Information

### Prominent dielectric transitions in organic-inorganic hybrids: (isoamyl-ammonium)<sub>2</sub>CdX<sub>4</sub> (X = Cl and Br)

Zhongxia Wang, Xing-Hui Lv, Yu-Ling Liu, Yang Lu, Hai-Peng Chen and Jia-Zhen Ge\*

*Ordered Matter Science Research Center, Jiangsu Key Laboratory for Science and Applications  
of Molecular Ferroelectrics, College of Chemistry and Chemical Engineering, Southeast  
University, Nanjing 211189, PR China*

\*E-mail: gjz@seu.edu.cn

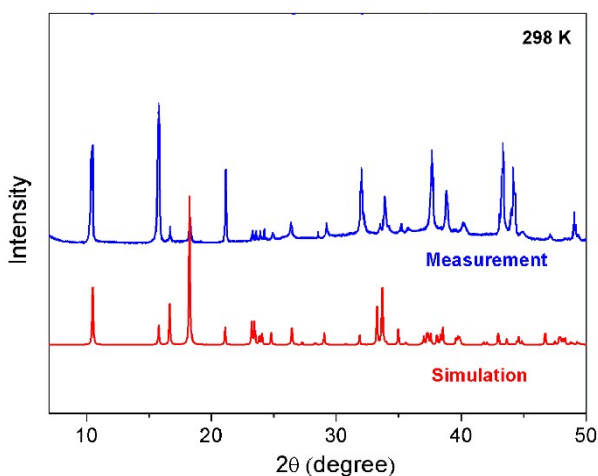

**Fig. S1** Experimental powder diffraction (XRPD) patterns of **1** measured at 298 K matching very well with the simulated ones.

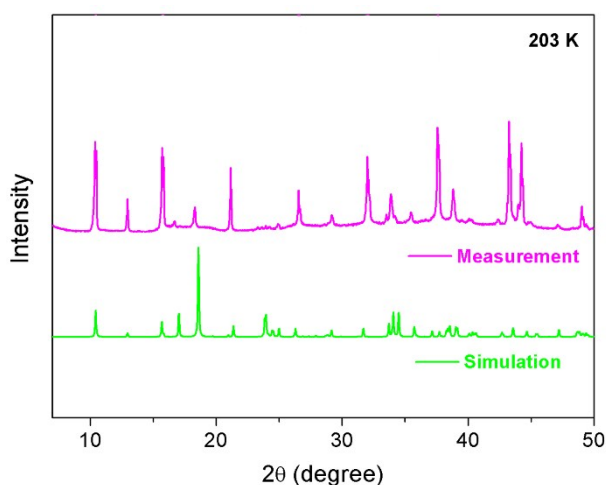

**Fig. S2** Experimental powder diffraction (XRPD) patterns of **1** measured at 203 K matching very well with the simulated ones.

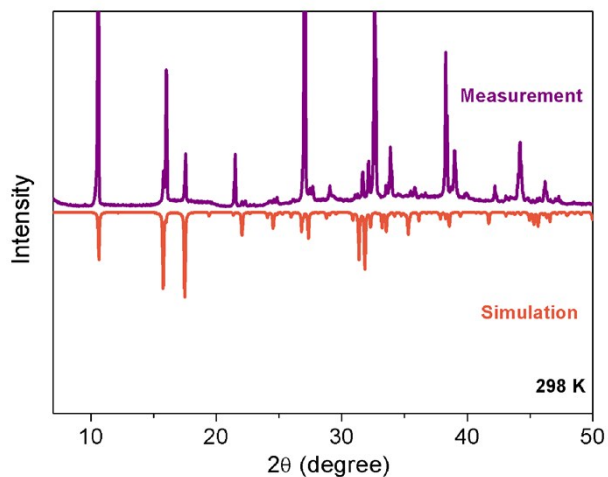

**Fig. S3** Experimental powder diffraction (XRPD) patterns of **2** measured at 298 K matching very well with the simulated ones.

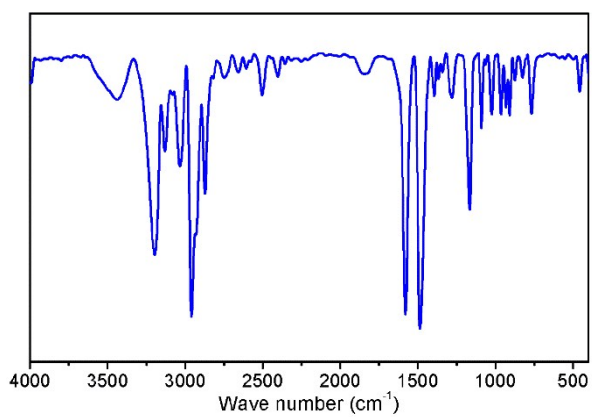

**Fig. S4** Infrared (IR) spectra of solid **1** in KBr pellet recorded on a Shimadzu model IR-60 spectrometer at room temperature.

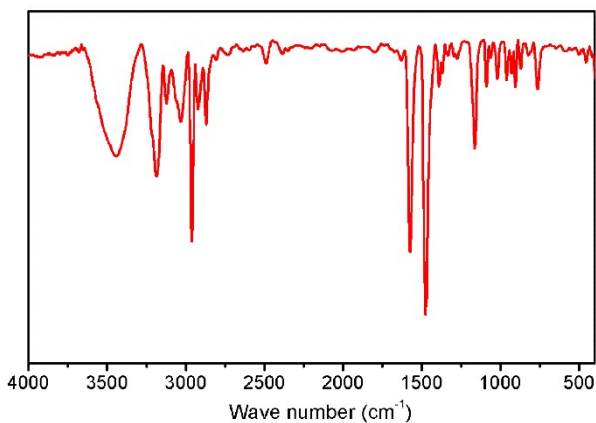

**Fig. S5** Infrared (IR) spectra of solid **2** in KBr pellet recorded on a Shimadzu model IR-60 spectrometer at room temperature.

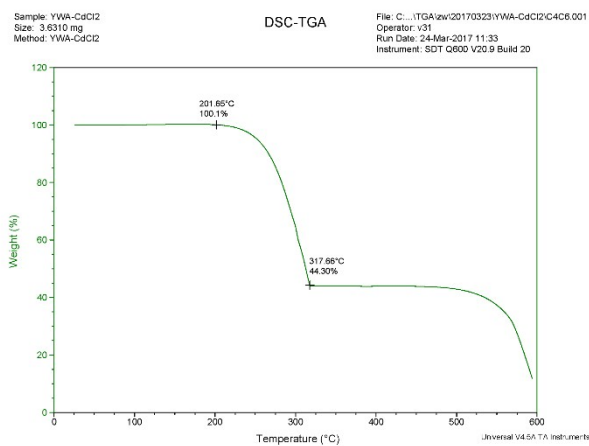

**Fig. S6** TGA curve of **1** measured in the temperature range of 25-600 °C.

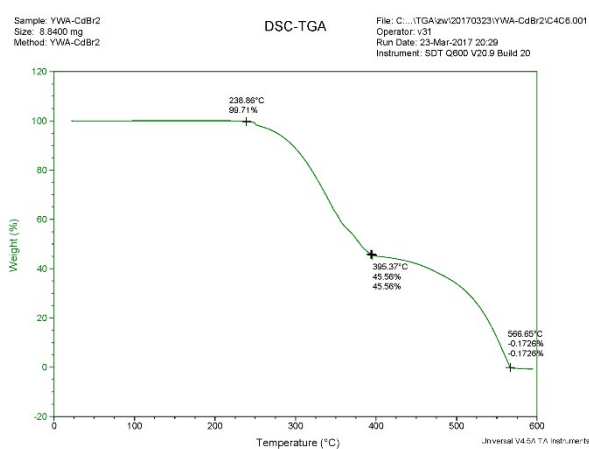

**Fig. S7** TGA curve of **2** measured in the temperature range of 25-600 °C.

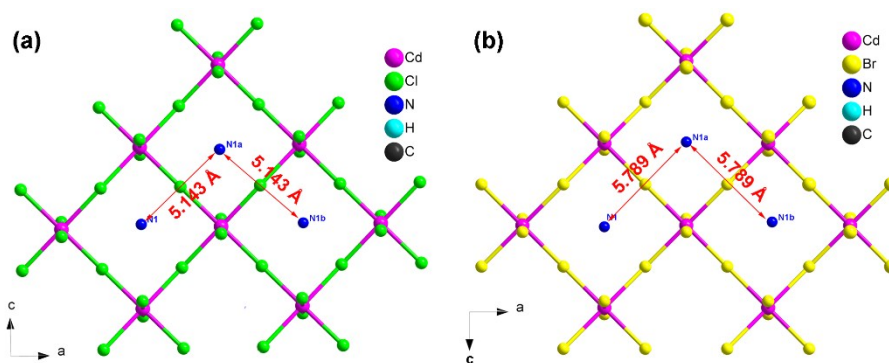

**Fig. S8** The distance of adjacent organic cation in **1** (a) and **2** (b). Only N atoms were retained for clarity.

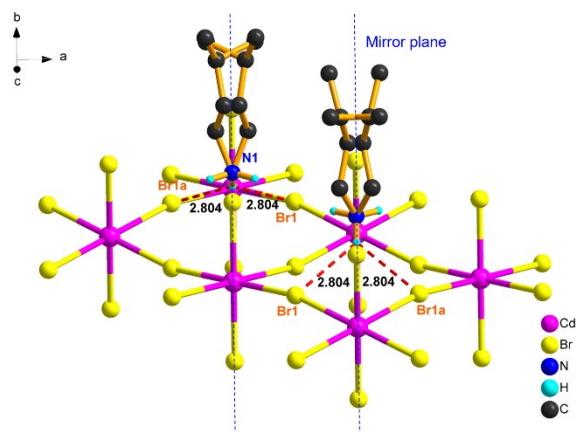

**Fig. S9** Hydrogen-bonding interactions (red dashed lines) between the organic and inorganic components in **2** at 298 K. The blue dashed lines stand for the mirror plane. Hydrogen atoms bonded to the C atoms were omitted for clarity.

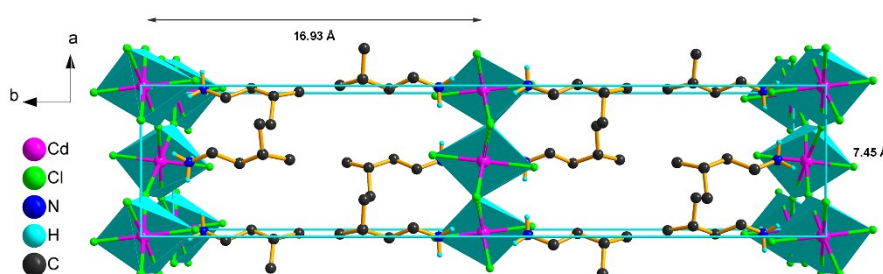

**Fig. S10** Perspective view of **1** at 203 K. Hydrogen atoms bonded to the C atoms were omitted for clarity.

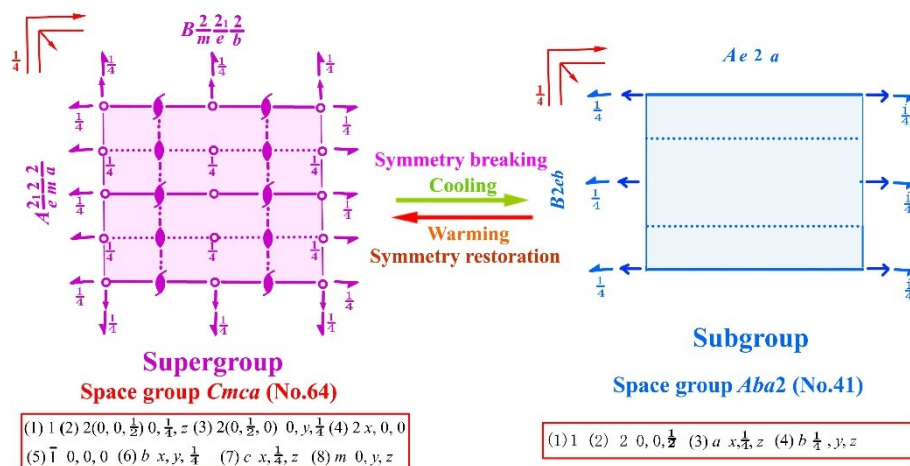

**Fig. S11** Spatial symmetry operation changes of **1** from the HTP (*Cmca*) to the LTP (*Aba2*).

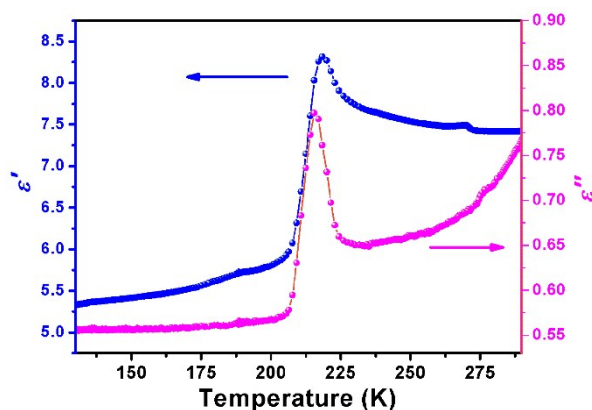

**Fig. S12** The temperature-dependence of the real part ( $\epsilon'$ ) and dielectric imaginary part ( $\epsilon''$ ) of the polycrystalline sample of **2** at 1000 kHz.

**Table S1** Crystal data and structure refinements for **1** and **2**.

| Compound                       | <b>1</b>     |             | <b>2</b>     |
|--------------------------------|--------------|-------------|--------------|
| $T$ (K)                        | 298          | 203         | 298          |
| Formula wt                     | 430.55       | 430.55      | 608.35       |
| Space group                    | <i>Cmca</i>  | <i>Aba2</i> | <i>Cmca</i>  |
| $a/\text{\AA}$                 | 7.5775(15)   | 7.45(3)     | 8.0554(10)   |
| $b/\text{\AA}$                 | 33.673(7)    | 33.85(17)   | 33.2382(9)   |
| $c/\text{\AA}$                 | 7.6500(15)   | 7.42(4)     | 8.0623(5)    |
| $\beta$ (deg)                  | 90           | 90          | 90           |
| Volume ( $\text{\AA}^3$ ), $Z$ | 1952.0(7), 4 | 1871(16), 4 | 2158.7(3), 4 |
| $F(000)$                       | 872          | 872         | 1160         |
| Collected rflns                | 6233         | 7412        | 4805         |
| Unique rflns                   | 1175         | 2054        | 729          |
| GOF                            | 1.132        | 1.182       | 1.127        |
| $R_1$                          | 0.0480       | 0.0969      | 0.1074       |
| $wR_2[I > 2\sigma(I)]$         | 0.1262       | 0.2494      | 0.3026       |

**Table S2.** Selected bond lengths [ $\text{\AA}$ ] and angles [ $^\circ$ ] for **1**<sup>a</sup> at 298 K and 203 K.

|       |                                          |            |                                          |            |
|-------|------------------------------------------|------------|------------------------------------------|------------|
| 298 K | Cd1-C11                                  | 2.7062(4)  | Cd1-C12                                  | 2.554(2)   |
|       | C12 <sup>i</sup> -Cd1-C11 <sup>i</sup>   | 90.31(5)   | C12-Cd1-C11 <sup>i</sup>                 | 89.69(5)   |
|       | C12 <sup>i</sup> -Cd1-C11 <sup>ii</sup>  | 90.31(5)   | C12-Cd1-C11 <sup>ii</sup>                | 89.69(5)   |
|       | C11 <sup>i</sup> -Cd1-C11 <sup>ii</sup>  | 88.856(18) | C12 <sup>i</sup> -Cd1-C11                | 89.69(5)   |
|       | C12-Cd1-C11                              | 90.31(5)   | C11 <sup>ii</sup> -Cd1-C11               | 91.144(18) |
|       | C12 <sup>i</sup> -Cd1-C11 <sup>iii</sup> | 89.69(5)   | C12-Cd1-C11 <sup>iii</sup>               | 90.31(5)   |
|       | C11 <sup>i</sup> -Cd1-C11 <sup>iii</sup> | 91.144(18) | C11-Cd1-C11 <sup>iii</sup>               | 88.856(18) |
| 203 K | Cd1-C11                                  | 2.627(14)  | Cd1-C12                                  | 2.563(13)  |
|       | C12-Cd1-C11 <sup>iv</sup>                | 91.4(2)    | C12 <sup>iv</sup> -Cd1-C11 <sup>iv</sup> | 97.0(2)    |
|       | C12-Cd1-C11                              | 97.0(2)    | C12 <sup>iv</sup> -Cd1-C11               | 91.4(2)    |

|                                          |         |                                          |         |
|------------------------------------------|---------|------------------------------------------|---------|
| C11 <sup>iv</sup> -Cd1-C11               | 84.6(8) | C12-Cd1-C11 <sup>v</sup>                 | 88.3(2) |
| C12 <sup>iv</sup> -Cd1-C11 <sup>v</sup>  | 84.1(2) | C11-Cd1-C11 <sup>v</sup>                 | 88.9(4) |
| C12-Cd1-C11 <sup>vi</sup>                | 84.1(2) | C12 <sup>iv</sup> -Cd1-C11 <sup>vi</sup> | 88.3(2) |
| C11 <sup>iv</sup> -Cd1-C11 <sup>vi</sup> | 88.9(4) | C11 <sup>v</sup> -Cd1-C11 <sup>vi</sup>  | 97.5(8) |

<sup>a</sup> Symmetry codes: (i) -x+1,-y+1,-z (ii) -x+3/2,-y+1,z-1/2 (iii) x-1/2,y,-z+1/2 (iv) -x+1,-y+2,z (v) -x+1/2,y,z-1/2 (vi) x+1/2,-y+2,z-1/2

**Table S3.** Selected bond lengths [Å] and angles [°] for **2<sup>a</sup>** at 298 K.

|       |                                           |           |                                           |           |
|-------|-------------------------------------------|-----------|-------------------------------------------|-----------|
| 298 K | Cd1-Br1                                   | 2.8670(6) | Cd1-Br2                                   | 2.695(3)  |
|       | Br2 <sup>i</sup> -Cd1- Br1 <sup>i</sup>   | 91.56(12) | Br2-Cd1- Br1 <sup>i</sup>                 | 88.44(12) |
|       | Br2 <sup>i</sup> -Cd1- Br1 <sup>ii</sup>  | 88.44(12) | Br2-Cd1- Br1 <sup>ii</sup>                | 91.56(12) |
|       | Br1 <sup>i</sup> -Cd1- Br1 <sup>iii</sup> | 90.76(3)  | Br2 <sup>i</sup> -Cd1- Br1 <sup>iii</sup> | 91.56(12) |
|       | Br2-Cd1- Br1 <sup>iii</sup>               | 88.44(12) | Br1 <sup>i</sup> -Cd1- Br1 <sup>iii</sup> | 89.24(2)  |
|       | Br2 <sup>i</sup> -Cd1- Br1                | 88.44(12) | Br2-Cd1- Br1                              | 91.56(12) |
|       | Br1 <sup>ii</sup> -Cd1- Br1               | 89.24(3)  | Br1 <sup>iii</sup> -Cd1- Br1              | 90.76(3)  |

<sup>a</sup> Symmetry codes: (i) -x+1,-y+1,-z (ii) x-1/2,y,-z+1/2 (iii) -x+3/2,-y+1,z-1/2

**Table S4.** Hydrogen-Bond Geometry (Å, deg) for N-H···Cl interactions at 298 K and 203 K in **1<sup>a</sup>**.

|       | D-H···A                     | H···A | D···A    | D-H···A |
|-------|-----------------------------|-------|----------|---------|
| 298 K | N1-H1A···Cl1 <sup>i</sup>   | 2.94  | 3.406(5) | 114.6   |
|       | N1-H1A···Cl1 <sup>ii</sup>  | 2.56  | 3.406(5) | 158.1   |
|       | N1-H1B···Cl1 <sup>iii</sup> | 2.91  | 3.565(6) | 132.1   |
|       | N1-H1C···Cl2 <sup>iii</sup> | 2.68  | 3.320(7) | 129.4   |
| 203 K | N1-H1A···Cl1 <sup>iv</sup>  | 2.54  | 3.04(3)  | 116.5   |
|       | N1-H1B···Cl1 <sup>v</sup>   | 2.67  | 3.52(3)  | 159.0   |
|       | N1-H1C···Cl1 <sup>vi</sup>  | 2.52  | 3.39(3)  | 163.7   |

<sup>a</sup> Symmetry codes: (i) x-1,y,z (ii) x-1/2,y,-z+1/2 (iii) -x+1/2,-y+1,z-1/2 (iv) -x+1,-y+2,z (v) x+1/2,-y+2,z+1/2 (vi) -x+1/2,y,z+1/2

**Table S5.** Hydrogen-Bond Geometry (Å, deg) for N-H···Br interactions at 298 K in **2<sup>a</sup>**.

|       | D-H···A                   | H···A | D···A   | D-H···A |
|-------|---------------------------|-------|---------|---------|
| 298 K | N1-H1A···Br1              | 2.80  | 3.47(7) | 132.5   |
|       | N1-H1A···Br1 <sup>i</sup> | 2.80  | 3.47(7) | 132.5   |

<sup>a</sup> Symmetry codes: (i) x+1/2,y,-z+1/2
